# Supplementary material for: Alkenone isotopes show evidence of active carbon concentrating mechanisms in coccolithophores as aqueous carbon dioxide concentrations fall below 7 µmol L −1
Source: Copernicus journal article supplement (doi:10.5194/bg-18-1149-2021), 2021-02-15
Supplement: Supplementary file 1 [file bg-18-1149-2021-supplement.zip]

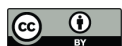

## *Supplement of*

# **Alkenone isotopes show evidence of active carbon concentrating mechanisms in coccolithophores as aqueous carbon dioxide concentrations fall below $7 \mu\text{mol L}^{-1}$**

**Marcus P. S. Badger**

*Correspondence to:* Marcus P. S. Badger ([marcus.badger@open.ac.uk](mailto:marcus.badger@open.ac.uk))

- [bg-18-1149-2021-supplement-title-page.pdf](#)
- [Badger-bg-2020-356-Supplement](#)
  - [Bereiter\\_ice\\_core\\_composite.txt](#)
  - [CO2\\_uncertainties.csv](#)
  - [Compiled G\\_IG alkenone data.csv](#)
  - [Paper22-bg-2020-356-Supplement.pdf](#)
  - [Paper22-bg-2020-356Supplement.Rmd](#)

The copyright of individual parts of the supplement might differ from the CC BY 4.0 License.
